# Supplementary material
Source: PubMed Central journal article supplement (PMC122919)
Supplement: pnas_082562199_2.pdf [file pnas_082562199_2.pdf]

**Table 2. Rate of recombination within the *a1-sh2* interval**

| Year               | No. recombinants <sup>*</sup> |      |       | Population Size | cM <sup>†</sup> |
|--------------------|-------------------------------|------|-------|-----------------|-----------------|
|                    | Clsh                          | clrd | Total |                 |                 |
| 1992 <sup>‡</sup>  | 28                            | 47   | 75    | 67,000          | 0.11 ± 0.01     |
| 1993               | 46                            | 54   | 100   | 182,000         | 0.055 ± 0.005   |
| Total <sup>§</sup> | 74                            | 101  | 175   | 249,000         | 0.070 ± 0.005   |

Clsh: colored shrunken kernels; clrd: colorless round kernels.

<sup>\*</sup>Based on corrected numbers from Table 1.

<sup>†</sup>Genetic distances were calculated as follows: cM = (no. of recombinants / population size) X 100.

<sup>‡</sup>These data have been extended from those of Civardi *et al* (1).

<sup>§</sup>A homogeneity  $\chi^2$  test indicated that there was a significant difference in the rates of recombination between these two years. However, because no differences were found between the distributions of the recombination breakpoints, data were combined across years to calculate recombination rates and genetic distances.

#### Reference:

1. Civardi, L., Xia, Y. J., Edwards, K. J., Schnable, P. S. & Nikolau, B. J. (1994) *Proc. Natl. Acad. Sci. USA* **91**, 8268-8272.
