# Supplementary material
Source: PubMed Central journal article supplement (PMC122919)
Supplement: pnas_082562199_3.pdf [file pnas_082562199_3.pdf]

Supporting information for Yao *et al.* (April 16, 2002) *Proc. Natl. Acad. Sci. USA*, 10.1073/pnas.082562199.

**Table 3. RFLP hybridization patterns associated with intergenic recombination events**

|                           |        | Restriction enzymes and probes used to detect RFLPs |                      |            |                |                          |               |                            |
|---------------------------|--------|-----------------------------------------------------|----------------------|------------|----------------|--------------------------|---------------|----------------------------|
| Haplotype                 | Class* | <i>EcoR</i> I                                       |                      |            | <i>Bgl</i> III |                          | <i>EcoR</i> I | No. of events <sup>§</sup> |
|                           |        | php10080                                            | a1-4300              | 9-10a5-800 | x1-400         | 2-32a2-1000 <sup>‡</sup> | sh2-1000      |                            |
| 35 <i>Al</i> * <i>sh2</i> | 1a     | LC <sup>†</sup> (9.5)                               | N <sup>†</sup> (8.8) | N (8.8)    | a1 (3.0)       | a1                       | a1 (>12)      | 11                         |
|                           | 2a     | LC (9.5)                                            | LC (6.8)             | N (3.9)    | a1 (3.0)       | a1                       | a1 (>12)      | 8                          |
|                           | 3a     | LC (9.5)                                            | LC (6.8)             | LC (4.3)   | a1 (3.0)       | a1                       | a1 (>12)      | 8                          |
|                           | 4a     | LC (9.5)                                            | LC (6.8)             | LC (4.3)   | LC (10)        | a1                       | a1 (>12)      | 5                          |
|                           | 5      | LC (9.5)                                            | LC (6.8)             | LC (4.3)   | LC (10)        | LC                       | a1 (>12)      | 1                          |
|                           | 6      | a1 <sup>†</sup> (>12)                               | LC (6.8)             | LC (4.3)   | a1 (3.0)       | a1                       | a1 (>12)      | 2                          |
| 66 <i>al</i> * <i>Sh2</i> | 1b     | a1 (>12)                                            | N (7.5)              | LC (4.3)   | LC (10)        | LC                       | LC (3.5)      | 8                          |
|                           | 2b     | a1 (>12)                                            | N (9.9)              | LC (4.3)   | LC (10)        | LC                       | LC (3.5)      | 26                         |
|                           | 3b     | a1 (>12)                                            | a1 (9.5)             | a1 (9.5)   | LC (10)        | LC                       | LC (3.5)      | 31                         |
|                           | 4b     | a1 (>12)                                            | ND <sup>†</sup>      | a1 (9.5)   | N (3.5)        | LC                       | LC (3.5)      | 1                          |

\* Pairs of class 1a/1b, 2a/2b, 3a/3b, and 4a/4b represent hybridization patterns that resulted from reciprocal crossover events.

† LC and a1: hybridization patterns indistinguishable from those of the Line C and *a1::rdt sh2* stocks, respectively. N: novel (nonparental) hybridization pattern. ND: no data. Sizes of fragments (in kb) detected by the indicated RFLP markers are shown in parentheses.

‡ Multiple hybridization bands were detected in both the Line C and *a1::rdt sh2* stocks with this probe. A 5.5-kb fragment that is specific to Line C and that cosegregates with the *A1-LC Sh2* haplotype was used for mapping purpose.

§ One class 2b, one class 3b and one class 4b event were not subjected to hybridization with probe a1-4300. One class 1b event and one class 2b event were subjected to RFLP analysis with probe x1-400 only. All of these events were analyzed by PCR using allele-specific primers that can detect polymorphisms in the *a1*, *yz1*, and *sh2* loci.
